# Supplementary material for: GOLM1 and FAM49B: Potential Biomarkers in HNSCC Based on Bioinformatics and Immunohistochemical Analysis
Source: MDPI journal article supplement (doi:10.3390/ijms232315433), 2022-12-06
Supplement: s1 [file s1]

**Table S1.** Clinicopathological characters of HNSCC in TMAs

| Characteristics          | Sub-characteristics | N (%)     |
|--------------------------|---------------------|-----------|
| Age(years)               |                     | 64(30-82) |
| Gender                   | Male                | 75(0.4)   |
|                          | Female              | 8(9.6)    |
| Tumor size(T)            | T1                  | 12(14.5)  |
|                          | T2                  | 35(42.2)  |
|                          | T3                  | 29(34.9)  |
|                          | T4                  | 7(8.4)    |
| Lymph node metastasis(N) | N0                  | 44(53.0)  |
|                          | N1                  | 28(33.7)  |
|                          | N2                  | 11(13.3)  |
|                          |                     |           |
| Distant metastasis(M)    | M0                  | 83(100.0) |
|                          | M1                  | 0(0.0)    |
| Grade                    | I                   | 32(38.6)  |
|                          | II                  | 27(32.5)  |
|                          | III                 | 24(28.9)  |
| TNM stage                | I+II                | 26(31.3)  |
|                          | III                 | 41(49.4)  |
|                          | IVA                 | 16(19.3)  |
| The location             | throat              | 33(39.7)  |
|                          | head and neck       | 13(15.7)  |
|                          | tongue              | 16(19.3)  |
|                          | mouth               | 16(19.3)  |
|                          | the others          | 5(6.0)    |
| Total                    |                     | 83(100.0) |

**Table S2.** Associations of GOLM1 and FAM49B expression with clinicopathological parameters of HNSCC tissues

| Parameters               | Cases<br>(n=81) | GOLM1 in tumour cells |          |              | FAM49B in tumour cells |          |         |
|--------------------------|-----------------|-----------------------|----------|--------------|------------------------|----------|---------|
|                          |                 | Positive              | Negative | P value      | Positive               | Negative | P value |
| Gender                   |                 |                       |          | 0.784*       |                        |          | 0.826*  |
| Male                     | 73              | 54                    | 19       |              | 11                     | 62       |         |
| Female                   | 8               | 5                     | 3        |              | 2                      | 6        |         |
| Age                      |                 |                       |          | 0.117*       |                        |          | 1.000*  |
| <=64                     | 63              | 49                    | 14       |              | 10                     | 53       |         |
| >64                      | 18              | 10                    | 8        |              | 3                      | 15       |         |
| Depth of invasion(T)     |                 |                       |          | 0.163        |                        |          | 0.457   |
| T1,T2                    | 45              | 30                    | 15       |              | 6                      | 39       |         |
| T3,T4                    | 36              | 29                    | 7        |              | 7                      | 29       |         |
| Lymph node metastasis(N) |                 |                       |          | 0.482        |                        |          | 0.446   |
| N0                       | 42              | 32                    | 10       |              | 8                      | 34       |         |
| N1,N2                    | 39              | 27                    | 12       |              | 5                      | 34       |         |
| Grade                    |                 |                       |          | <b>0.004</b> |                        |          | 0.898*  |
| I,II                     | 58              | 37                    | 21       |              | 10                     | 48       |         |
| III                      | 23              | 22                    | 1        |              | 3                      | 20       |         |
| TNM stage                |                 |                       |          | 0.596        |                        |          | 0.277   |
| I+II                     | 24              | 16                    | 8        |              | 5                      | 19       |         |
| III                      | 41              | 30                    | 11       |              | 4                      | 37       |         |
| IVA                      | 16              | 13                    | 3        |              | 4                      | 12       |         |

\*: Continuity correction P value

**Table S3.** Combined score of the relationship between GOLM1 and its predicted functional partners.

| Partners of GOLM1 | Coexpression | Coexpression (Other organisms) | Experiments | Textmining | Textmining (Other organisms) | Combined score |
|-------------------|--------------|--------------------------------|-------------|------------|------------------------------|----------------|
| CLU               | 0.061        |                                |             | 0.914      | 0.041                        | 0.915          |
| GOLPH3            |              |                                |             | 0.820      |                              | 0.820          |
| EGFR              | 0.088        |                                | 0.270       | 0.714      |                              | 0.793          |
| NAA35             |              |                                |             | 0.418      | 0.621                        | 0.769          |
| AFP               |              |                                |             | 0.736      |                              | 0.736          |
| ENDOD1            |              |                                |             | 0.143      | 0.642                        | 0.680          |
| KATNAL1           |              |                                |             | 0.166      | 0.625                        | 0.673          |
| GOLIM4            |              |                                |             | 0.669      |                              | 0.669          |
| AMACR             |              |                                |             | 0.565      | 0.256                        | 0.662          |
| GPC3              |              |                                |             | 0.652      |                              | 0.652          |

**Table S4.** Combined score of the relationship between FAM49B and its predicted functional partners.

| Partners of FAM49B | Coexpression | Coexpression (Other organisms) | Experiments | Textmining | Textmining (Other organisms) | Combined Score |
|--------------------|--------------|--------------------------------|-------------|------------|------------------------------|----------------|
| ACTR3              | 0.673        | 0.063                          |             |            |                              | 0.680          |
| MTAP               |              |                                | 0.632       |            |                              | 0.632          |
| LRRC40             |              |                                |             | 0.341      | 0.463                        | 0.630          |
| ANGPTL7            |              |                                |             | 0.181      | 0.563                        | 0.626          |
| ANKS1A             | 0.073        |                                | 0.593       |            |                              | 0.606          |
| ANKS1B             | 0.073        |                                | 0.593       |            |                              | 0.606          |
| TINAG              |              | 0.067                          |             | 0.276      | 0.382                        | 0.546          |
| TEX2               |              |                                |             | 0.270      | 0.403                        | 0.545          |
| CLDN12             |              |                                |             | 0.155      | 0.483                        | 0.544          |
| PTGES3             | 0.525        |                                |             |            |                              | 0.525          |

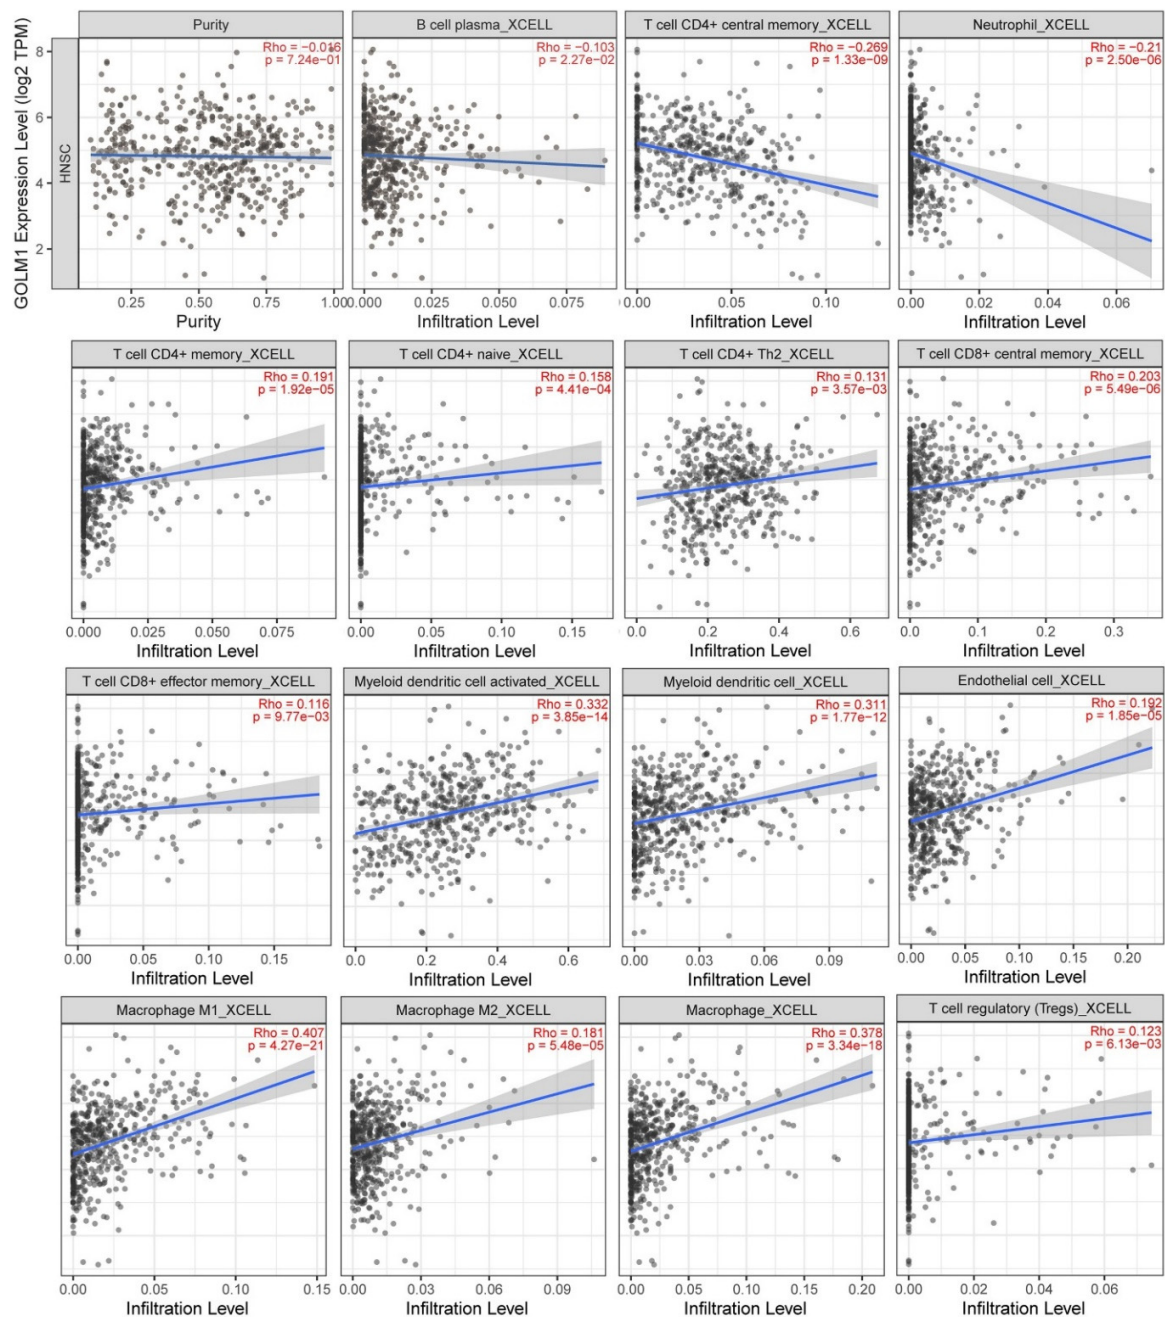

**Figure S1.** Correlation of GOLM1 expression with tumor purity and with the infiltration level of different immune cells estimated by TIMER2.0 in HNSCC. GOLM1 expression was positively correlated to T cell CD8<sup>+</sup> effector memory, T cell CD8<sup>+</sup> central memory, T cell CD4<sup>+</sup> naive, T cell CD4<sup>+</sup> memory, T cell CD4<sup>+</sup> Th2, regulatory T cells (Tregs), endothelial cell, macrophage, macrophage (M1, M2), myeloid dendritic cell, and myeloid dendritic cell activated. GOLM1 expression was negatively correlated with T cell CD4<sup>+</sup> central memory, B cell plasma, Neutrophil. The partial Spearman's correlation and statistical significance are shown on the top right corners.

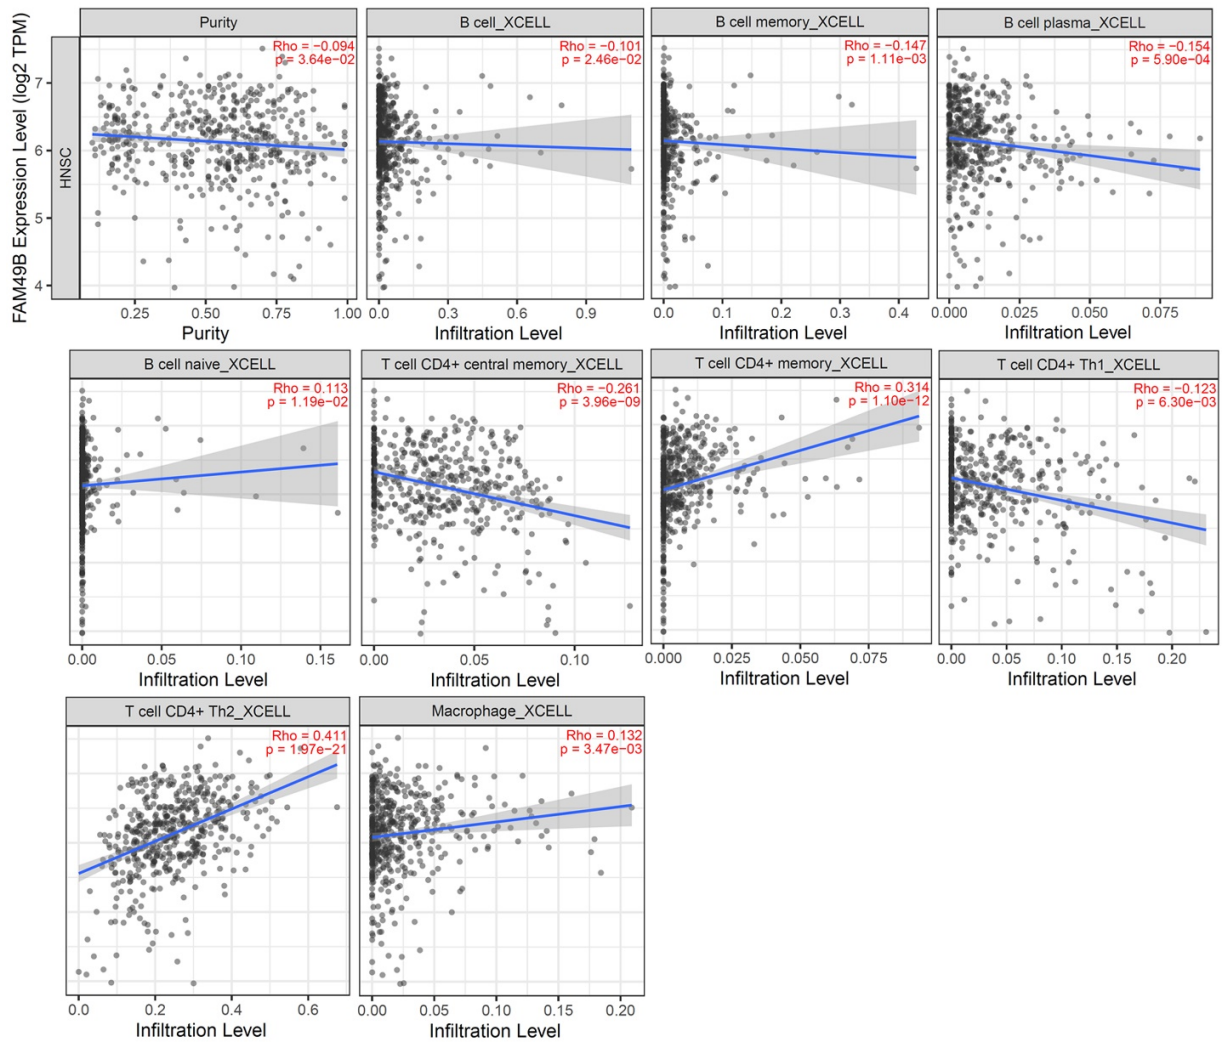

**Figure S2.** Correlation of FAM49B expression with different immune cells estimated by TIMER2.0 in HNSCC. FAM49B expression was positively correlated to T cell CD4<sup>+</sup> memory, T cell CD4<sup>+</sup> Th2, B cell naïve and Macrophage, while it was negatively related to T cell CD4<sup>+</sup> central memory, T cell CD4<sup>+</sup> Th1, B cell, B cell memory and B cell plasma. The purity-corrected partial Spearman correlation and statistical significance are shown on the top right corners.

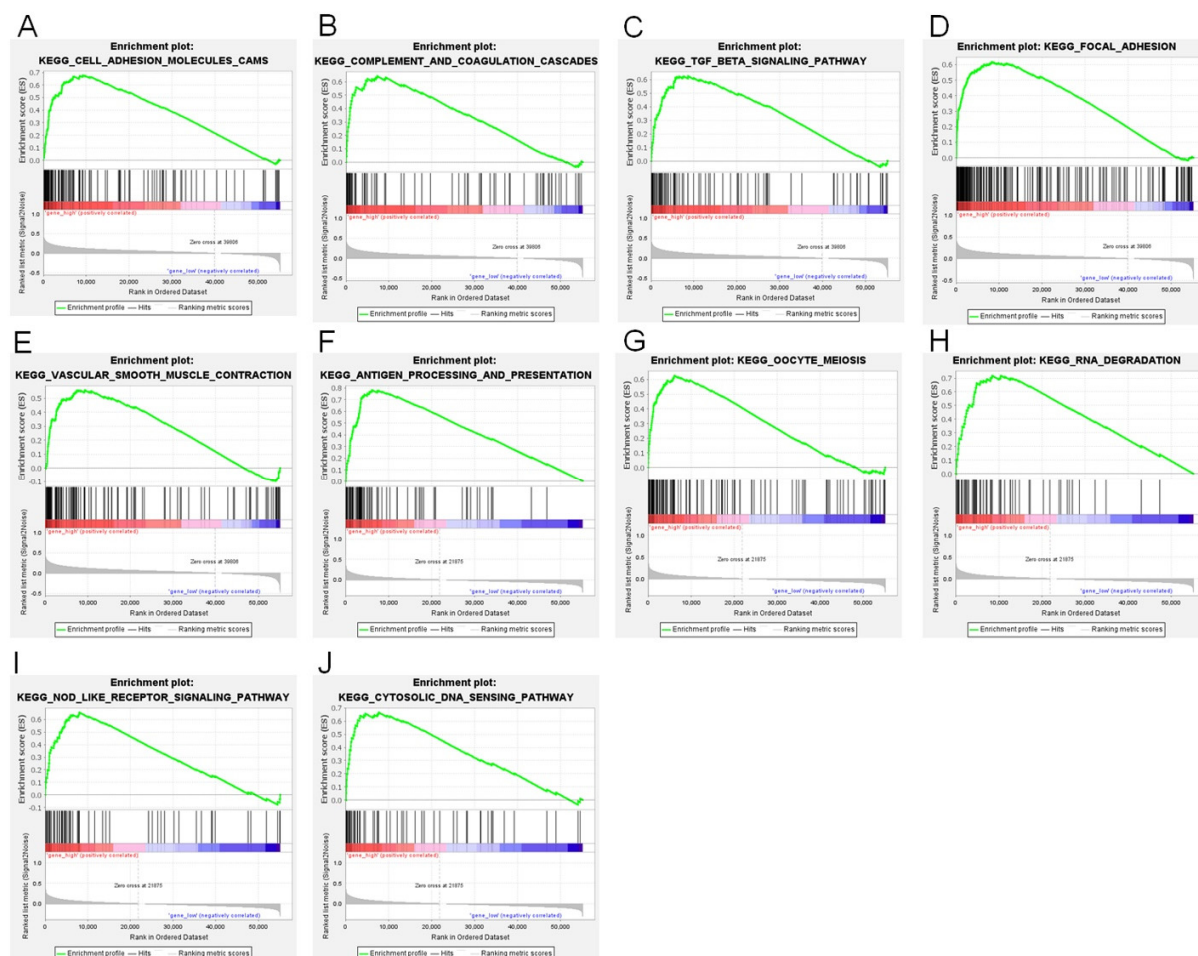

**Figure S3.** Top 5 pathways of GOLM1 and FAM49B genes. (A-E for GOLM1) Gene set enrichment plots of (A) cell adhesion molecules (CAMs), (B) complement and coagulation cascades, (C) TGF-beta signaling pathway, (D) focal adhesion, and (E) vascular smooth muscle contraction in HNSCC cases with high GOLM1 expression. (F-J for FAM49B) Gene set enrichment plots of (F) antigen processing and presentation, (G) oocyte meiosis, (H) RNA degradation, (I) NOD-like receptor signaling pathway, and (J) cytosolic DNA-sensing pathway in HNSCC cases with high FAM49B expression.
